# Supplementary material for: Hunter-Gatherer Energetics and Human Obesity
Source: PLOS journal article supplement (doi:10.1371/journal.pone.0040503), 2012-07-25
Supplement: S5 (10.1371/journal.pone.0040503.s005) [file journal.pone.0040503.s005]

## 1 **Supporting Information**

2 Pontzer et al. *Hunter Gatherer Energetics and the Origin of Human Obesity*

### 3 Hadza TEE Measurements

4 Total daily energy expenditure (TEE; kCal/day) was assessed using the doubly labeled  
5 water (DLW) method as outlined in the text and described in detail elsewhere [18]. The DLW  
6 method measures the amount of carbon dioxide produced and converts this rate of carbon  
7 dioxide production to a rate of energy expenditure using a respiratory quotient (RQ) of oxygen  
8 consumed:carbon dioxide produced. Following previous human studies [18], we used a RQ of  
9 0.85. While RQ can be affected by differences in diet, an RQ=0.85 was statistically  
10 indistinguishable from the mean RQ measured during RMR trials (see below) for 21 Hadza  
11 subjects (mean=0.88  $\pm$ 0.12), indicating that the RQ=0.85 value typically used in human DLW  
12 studies was accurate for calculating TEE for the Hadza sample. In fact, using the slightly (but  
13 not significantly) higher respiratory quotient measured among the Hadza would result in  
14 lowering their calculated TEE by approximately 2-3%. However, we use the more common  
15 value of RQ=0.85 here because it is more conservative for our comparisons of TEE.

16 TEE was measured at two different camps: Setako (n=18) and Sengeli (n=12). We  
17 measured TEE in Setako camp in September of 2009 and May-June of 2010, and in Sengeli  
18 camp in June 2010. Both September and May-June fall within “dry” seasons in this region [10].  
19 Weather throughout the measurement periods in both camps was sunny and dry, with occasional  
20 brief rain showers in the evenings; there were no weather events (e.g., long periods of rain) that  
21 affected normal foraging or camp activity. The Hadza do not adhere to a daily or weekly  
22 calendar, and thus weekly variation in energy expenditure that might be expected in Western  
23 populations is not a likely source of variation in TEE among the Hadza. Two individuals were  
24 measured at Setako in both 2009 and 2010 sessions. TEE measurements for these individuals

25 differed by 9% between sessions. Similarly, one subject was measured at both Setako and  
26 Sengeli in 2010; the difference in his TEE measurements was 11%. This degree of variation  
27 likely results primarily from fluctuation in energy expenditure, as the error variance inherent in  
28 the DLW method is approximately 3-5% [18]. For these three subjects, measurements taken  
29 during different sessions were averaged, and the mean values used for subsequent analysis.

30 TEE was positively correlated with body mass among Hadza adults ( $r^2=0.45$ ,  $p<0.001$ ,  
31  $df=29$ ). However, as in other populations, fat free mass (FFM, kg), was a better predictor of  
32 TEE, explaining 66% of the variance in TEE in a pooled sample of Hadza adults ( $r^2=0.66$ ,  $n=30$ ,  
33  $p<0.001$ ). Further, FFM was the only significant predictor of TEE ( $F(29)=11.90$ ,  $p=0.002$ ) in a  
34 multivariate analysis that included age ( $F(29)=0.18$ ,  $p=0.67$ ) and sex ( $F(29)=2.36$ ,  $p=0.14$ ).

35 Body mass index (BMI,  $\text{kg}/\text{m}^2$ ) for Hadza men ( $20.3 \pm 0.4$ ) and women ( $20.2 \pm 0.4$ ) were similar  
36 ( $p=0.93$  Student's t-test), while body fat percentage was greater in women ( $21\% \pm 1.2\%$ ) than  
37 men ( $13\% \pm 1.1\%$ ;  $p<0.001$ ). Mean BMI and body fat percentage were on the low end of the  
38 normal range for Western populations [31] (Table 1).

39

#### 40 Hadza RMR, estimated BMR, and Walking Cost

41 During RMR measurements subjects sat in a chair or on the ground (whichever they  
42 preferred) and rested quietly for 15 to 20 minutes. RMR measurements were taken in the early  
43 mornings or early evenings. We were not able to control whether subjects had eaten prior to  
44 RMR measurements. Energy expenditure during the last 10 minutes of data collection was  
45 averaged to determine RMR. RMR measures trended slightly higher (mean +11% for pooled  
46 subjects,  $p=0.06$  for paired t-test) than estimated BMR [27], as expected for subjects who are  
47 seated rather than supine [28].

48 Because resting metabolic rate was measured in seated rather than supine Hadza subjects,  
49 some of whom were post-prandial, and because not all subjects were able to participate in RMR  
50 measurements, we used an estimate of basal metabolic rate (BMR) rather than measured RMR to  
51 calculate Hadza PAL. To test whether our comparisons of PAL for Westerners and Hadza were  
52 affected by the use of measured – rather than estimated – BMR values for Westerners, we reran  
53 these comparisons using estimated BMR for the Western subjects. Results were unchanged;  
54 Western men had lower PAL than Hadza men ( $F(48)=9.08$ ,  $p=0.004$ ) and Western women had  
55 lower PAL than Hadza women ( $F(188)=5.40$ ,  $p=0.02$ ).

56 Energy expenditure during walking was measured while walking on a flat outdoor track  
57 constructed near camp. Subjects wore their normal clothing and sandals and walked 700 to 800  
58 meters at each of three different speeds (“slow”, “normal”, “fast”) while energy expenditure was  
59 measured using breath-by-breath respirometry (Cosmed K4b2). A researcher (HP) walked with  
60 each subject throughout to ensure constant walking speed, and pace was checked every 100m  
61 using a stopwatch. Gross walking cost (kCal/min) was calculated for each speed by taking the  
62 average rate of energy expenditure measured over the final 200 to 400 meters. RMR was then  
63 subtracted from gross walking cost to calculate net walking cost (kCal/min), which was then  
64 divided by speed and body mass to give net cost of transport, COT ( $\text{kCal kg}^{-1} \text{ meter}^{-1}$ ).  
65 Minimum COT,  $\text{COT}_{\min}$ , values were used for comparison with Western populations [28]. Mean  
66  $\text{COT}_{\min}$  for Hadza adults was  $0.53 \pm 0.13 \text{ kCal kg}^{-1} \text{ m}^{-1}$  and is shown in Figure S1. Mean walking  
67 speed for  $\text{COT}_{\min}$  trials was  $1.2 \pm 0.07$  meters/second. Mean  $\text{COT}_{\min}$  was similar to that measured  
68 in Western populations [28].

69 To estimate the percentage of TEE spent on walking, mean  $\text{COT}_{\min}$  was multiplied by  
70 mean daily travel distance for each subject, and this mean daily travel cost (kCal/day) was

71 divided by TEE. This provides an approximate, minimum cost of travel for each subject, since  
72  $COT_{min}$  represents walking cost at the energetically optimal speed over level ground. Real-world  
73 travel for the Hadza involves walking at a range of speeds across varied terrain. Thus, the true  
74 proportion of TEE expended on travel is likely somewhat higher than these estimates.

75

#### 76 Hadza Diet and Food Returns

77 As part of a long-term project on foraging returns, we identified and weighed all foods  
78 brought into each camp each day. Food weights were converted to calories using published  
79 estimates of energy density for Hadza foods [8,9]. For meat, energy density was estimated using  
80 a conservative value for domesticated animals (1100 kJ/100g dry weight), since game animals  
81 are relatively lean; sensitivity analyses revealed no effect on the estimated percentage of non-  
82 foraging foods when energy density values for meat ranged from 500 – 2000 kJ/100g dry weight.  
83 We are not aware of any published energy density values for Hadza game animals.

84 In Setako camp, food return data indicated that 3 – 4% of the calories consumed by  
85 residents came from traded agricultural foods (e.g., corn). In Sengeli camp, no traded foods were  
86 brought into camp during our two-week stay. Estimated percentages of calories consumed per  
87 food type are shown for each camp in Figure S2.

88 As noted in the main text, a significant percentage of calories in the Hadza diet come  
89 from honey. Food return data suggest honey accounted for 8% of caloric intake at Setako camp  
90 and 16% at Sengeli camp. These values, which are based on food brought back to camp, likely  
91 underestimate the true percentage of honey in the diet since honey is often eaten by men while  
92 out of camp on hunting forays.

93

94 Comparative U.S. TEE Data: New Measurements

95 Additional TEE measurements for U.S. adults (n=68) were conducted in free-living  
96 human subjects during 2-week periods using the DLW method [18]. Two baseline urine samples  
97 were collected, after which an oral dose of DLW was administered (0.20 g H<sub>2</sub><sup>18</sup>O, 0.12 g <sup>2</sup>H<sub>2</sub>O  
98 per kg total body water). Post-dose urine samples were collected on days 0, 7, and 14 and  
99 analyzed in duplicate for <sup>18</sup>O and <sup>2</sup>H abundance by isotope ratio mass spectrometry.

100
